# Supplementary material
Source: publisher site journal article supplement (https://www.spandidos-publications.com/8389/downloadSupplementary)

Figure S1. Reverse transcription-quantitative PCR amplification plot showing the fluorescence intensity of androgen receptor gene expression across different cycles in bladder tissue samples from controls and patients with bladder cancer.

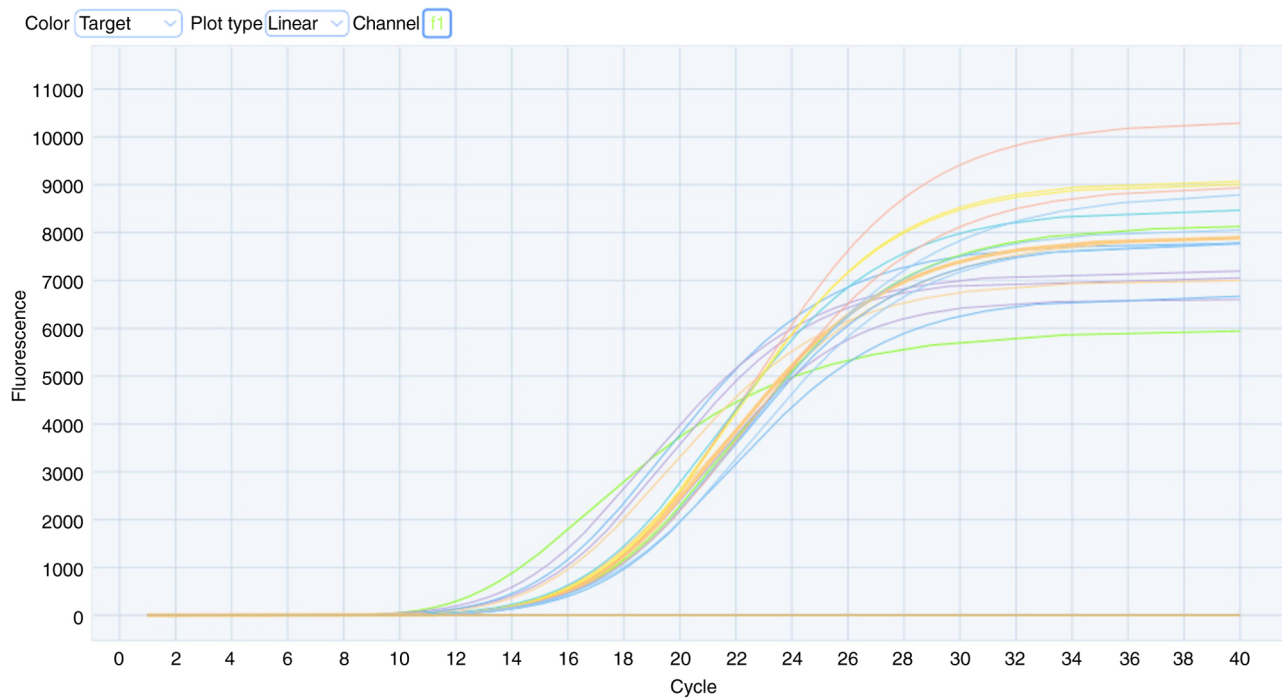

Figure S2. Reverse transcription-quantitative PCR amplification plot showing the fluorescence intensity of estrogen receptor 1 gene expression across different cycles in bladder tissue samples from controls and patients with bladder cancer.

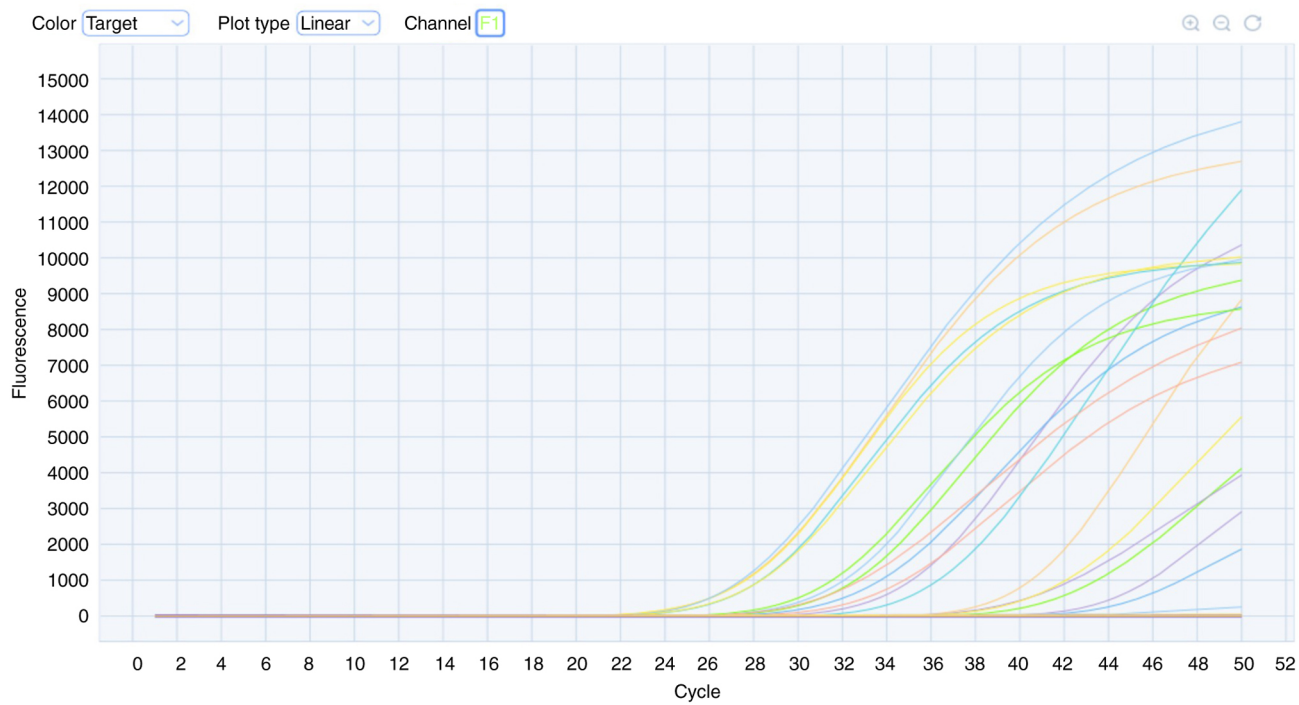

Figure S3. Reverse transcription-quantitative PCR amplification plot showing the fluorescence intensity of housekeeping gene GAPDH expression across different cycles in bladder tissue samples from controls and patients with bladder cancer.

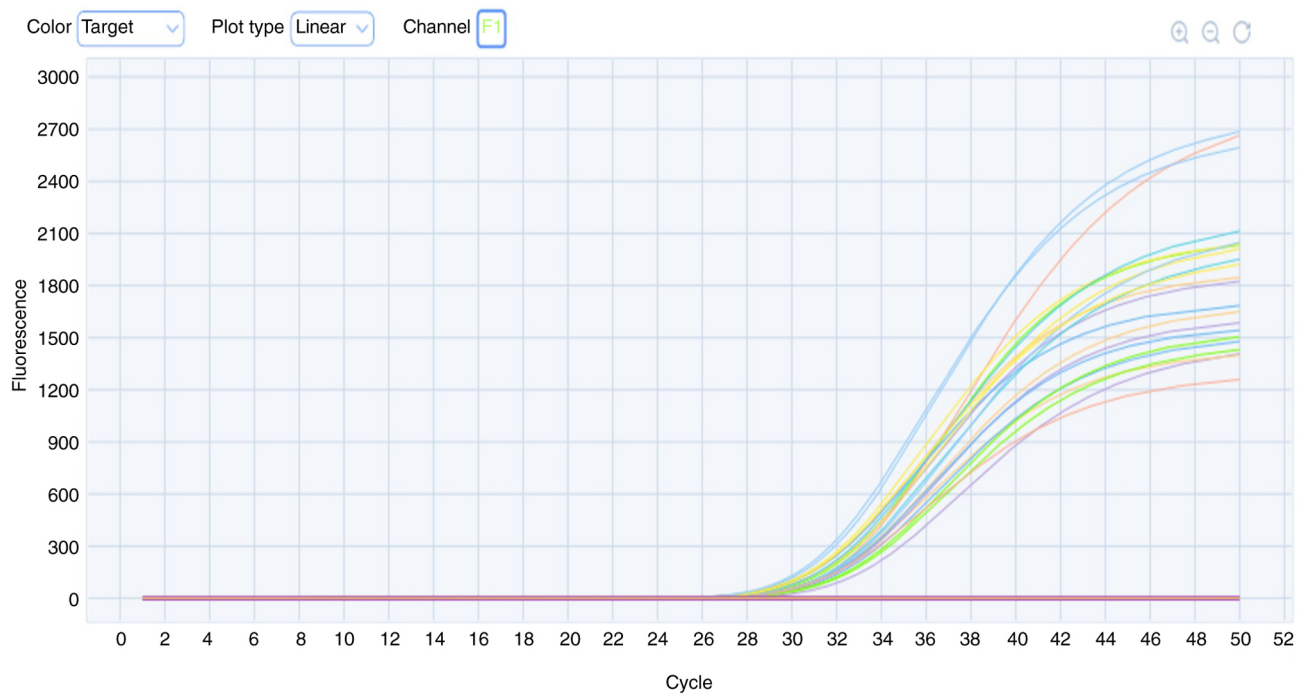

Supplement: Supplementary file 1 [file downloadSupplementary]
